# Supplementary material
Source: HighWire-hosted journal article supplement (https://www.genetics.org/content/suppl/2015/06/29/genetics.115.177394)
Supplement: FigureS8.pdf [file FigureS8.pdf]

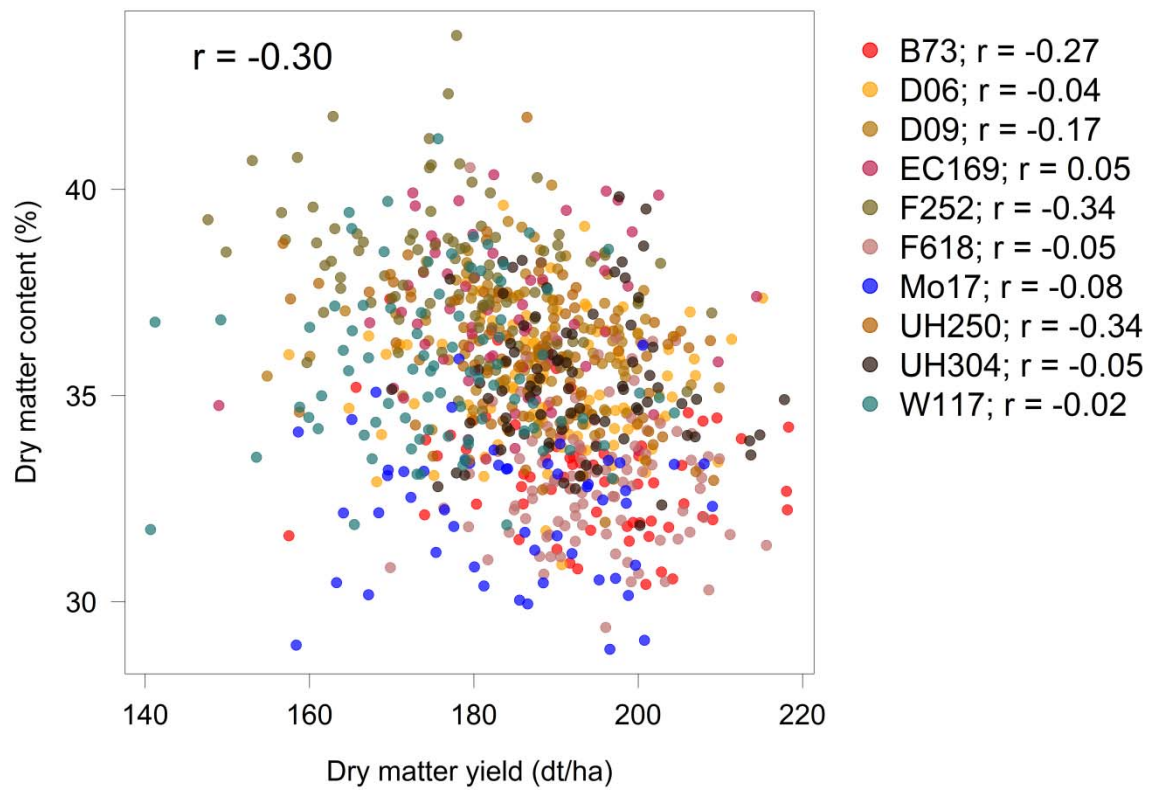

**Figure S8** Scatterplot and phenotypic correlations between dry matter yield (dt/ha) and dry matter content (%) within each maize family (families are specified by their specific parental line).
